# Supplementary material for: Volatile per- and polyfluoroalkyl substances (PFAS) and other semi-volatile organic chemicals in indoor air of fire stations: the influence of gear storage conditions
Source: Royal Society of Chemistry journal article supplement (doi:10.1039/d6em00069j), 2026-04-07
Supplement: d6em00069j1.pdf [file d6em00069j1.pdf]

1  
2  
3

## SUPPORTING INFORMATION

### 4 **Volatile Per- and Polyfluoroalkyl Substances (PFAS) and other Semi-Volatile** 5 **Organic Chemicals in Indoor Air of Fire Stations: The Influence of Gear** 6 **Storage Conditions**

7

8 Heather M. Stapleton<sup>1\*</sup>, Nicholas J. Herkert<sup>1</sup>, Duncan Hay<sup>1</sup>, Kate Hoffman<sup>1</sup>, R. Bryan Ormond<sup>2</sup>

9

10 <sup>1</sup>Nicholas School of the Environment, Duke University, *Durham, NC, 27710, USA,*

11 <sup>2</sup>Wilson College of Textiles, N.C. State University, *Raleigh, NC, 27695 USA*

12

13 HMS: ORCID 0000-0002-9995-6517

14 NJH: ORCID 0000-0002-3286-8934

15 KH: ORCID 0000-0001-8029-7710

16 RBO: ORCID 0000-0001-9799-546X

#### **Email Addresses:**

HMS- [heather.stapleton@duke.edu](mailto:heather.stapleton@duke.edu); NH-[nicholas.herkert@duke.edu](mailto:nicholas.herkert@duke.edu); DH-[duncan.hay@duke.edu](mailto:duncan.hay@duke.edu);  
KH- [kate.hoffman@duke.edu](mailto:kate.hoffman@duke.edu); BO- [rbormond@ncsu.edu](mailto:rbormond@ncsu.edu);

#### **\*Corresponding Author:**

Heather M. Stapleton, Ph.D.

Duke University, Nicholas School of the Environment

9 Circuit Drive, Box 90328

Durham, NC 27708

Phone: 919-613-8717

Email: [heather.stapleton@duke.edu](mailto:heather.stapleton@duke.edu)

17  
18  
19  
20

21  
22  
23  
24  
25  
26  
27  
28  
29  
30  
31  
32  
33  
34  
35  
36  
37  
38  
39  
40  
41  
42  
43  
44

**Supplementary Figure S1.** Photos highlighting examples of closed (left) and open (right) turnout gear storage locations that were sampled during the study.

47  
48  
49  
50  
51  
52  
53

54  
55

56 **Supplementary Figure S2.** The potential mechanism by which side-chain fluorinated polymers (SFPs) could release neutral, volatile  
57 PFAS into indoor air in fire stations.

58  
59

60  
61  
62  
63  
64  
65  
66  
67  
68  
69  
70  
71  
72  
73  
74  
75  
76  
77  
78  
79  
80  
81  
82  
83  
84  
85  
86  
87  
88  
89  
90

91 **Supplementary Figure S3.** Spearman correlation heat map displaying correlations among the SVOCs measured.

92 **Table S1.** Full list of volatile PFASs target analytes in the GC-HRMS panel, along with the internal standards and their recovery  
 93 during extraction.

| <b>Analytes</b>                              | <b>Abbreviation</b> | <b>CAS #</b> | <b>Internal Standard</b> | <b>Internal Standard Recovery</b> |
|----------------------------------------------|---------------------|--------------|--------------------------|-----------------------------------|
| 2-Perfluorohexyl ethanol                     | 6:2 FTOH            | 647-42-7     | 13C (M + 2) 6:2 FTOH     | 78 ± 7                            |
| 2-Perfluorooctyl ethanol                     | 8:2 FTOH            | 678-39-7     | 13C (M + 2) 8:2 FTOH     | 65 ± 11                           |
| 2-Perfluorodecyl ethanol                     | 10:2 FTOH           | 865-86-1     | 13C (M + 2) 8:2 FTOH     |                                   |
| N-methyl perfluorobutane sulfonamido ethanol | MeFBSE              | 34454-97-2   | d7-Et-FOSE               | 74 ± 12                           |
| N-methyl perfluorooctane sulfonamido ethanol | MeFOSE              | 24448-09-7   | d7-Et-FOSE               | 74 ± 12                           |
| N-ethyl perfluorooctane sulfonamido ethanol  | EtFOSE              | 1691-99-2    | d7-Et-FOSE               | 74 ± 12                           |
| Methyl-perfluorooctane sulfonamide           | MeFOSA              | 31506-32-8   | d-Et-FOSA                | 71 ± 14                           |
| Ethyl-perfluorooctane sulfonamide            | EtFOSA              | 4151-50-2    | d-Et-FOSA                | 71 ± 14                           |
| 2-Perfluorohexyl ethyl acrylate              | 6:2 FTAC            | 17527-29-6   | 13C (M + 2) 6:2 FTOH     | 78 ± 7                            |
| 2-Perfluorooctyl ethyl acrylate              | 8:2 FTAC            | 27905-45-9   | 13C (M + 2) 8:2 FTOH     | 65 ± 11                           |
| 2-Perfluorodecyl ethyl acrylate              | 10:2 FTAC           | 17741-60-5   | 13C (M + 2) 8:2 FTOH     | 65 ± 11                           |
| 2-Perfluorohexyl ethyl methacrylate          | 6:2 FTMAC           | 2144-53-8    | 13C (M + 2) 6:2 FTOH     | 78 ± 7                            |
| 2-Perfluorooctyl ethyl methacrylate          | 8:2 FTMAC           | 1996-88-9    | 13C (M + 2) 8:2 FTOH     | 65 ± 11                           |
| 4-Chlorobenzotrifluoride                     | PCBTF               | 98-56-6      | 13C (M + 2) 6:2 FTOH     | 78 ± 7                            |

94 **Table S2.** Full list of SVOC target analytes in the GC-EI-HRMS panel, along with the internal standards and their recovery during  
 95 extraction.

| <b>Analytes</b>                     | <b>Abbreviation</b> | <b>CAS #</b> | <b>Internal Standard</b> | <b>Internal Standard Recovery</b> |
|-------------------------------------|---------------------|--------------|--------------------------|-----------------------------------|
| Triethyl phosphate                  | TEP                 | 78-40-0      | d-TnBP                   | 90 ± 3.9                          |
| Tri-iso-butyl-phosphate             | TiBP                | 126-71-6     | d-TnBP                   | 90 ± 3.9                          |
| Triisopropyl phosphate              | TiPP                | 513-02-0     | d-TnBP                   | 90 ± 3.9                          |
| Tri-m-cresyl phosphate              | TmCP                | 563-04-2     | 13C TPhP                 | 101 ± 6.6                         |
| Tri-n-butyl-phosphate               | TnBP                | 126-73-8     | d-TnBP                   | 90 ± 3.9                          |
| Tri-o-cresyl phosphate              | ToCP                | 78-30-8      | 13C TPhP                 | 101 ± 6.6                         |
| Tri-p-cresyl phosphate              | TpCP                | 78-32-0      | 13C TPhP                 | 101 ± 6.6                         |
| Tripentyl phosphate                 | TPeP                | 2528-38-3    | d-TnBP                   | 90 ± 3.9                          |
| Triphenyl phosphate                 | TPhP                | 115-86-6     | 13C TPhP                 | 101 ± 6.6                         |
| Tripropyl phosphate                 | TPrP                | 513-08-06    | d-TnBP                   | 90 ± 3.9                          |
| 2-Ethylhexyl diphenyl phosphate     | EHDPP               | 1241-94-7    | 13C TPhP                 | 101 ± 6.6                         |
| Tris(2-ethylhexyl) phosphate        | TEHP                | 78-42-2      | 13C TPhP                 | 101 ± 6.6                         |
| Isodecyl diphenyl phosphate         | isodecylPP          | 29761-21-5   | 13C TPhP                 | 101 ± 6.6                         |
| Tri-(2-butoxyethyl)-phosphate       | TBOEP               | 78-51-3      | 13C-TBOEP                | 78 ± 8.9                          |
| Tris (2-chloro-ethyl) phosphate     | TCEP                | 115-96-8     | dTCEP                    | 101 ± 6.7                         |
| Tris (1-chloro-isopropyl) phosphate | TCPP                | 13674-84-5   | d-TnBP                   | 90 ± 3.9                          |
| Tris (2,4-dichloro-isopropyl)       | TDCPP               | 13674-87-8   | dTDCPP                   | 82 ± 9.0                          |

|                                              |           |            |          |           |
|----------------------------------------------|-----------|------------|----------|-----------|
| phosphate                                    |           |            |          |           |
| Tris(3,5-dimethyl phenyl) phosphate          | TDMPP     | 9006-37-5  | 13C TPhP | 101 ± 6.6 |
| 2-Isopropylphenyl diphenyl phosphate         | 2IPPDPP   | 64532-94-4 | 13C TPhP | 101 ± 6.6 |
| 3-Isopropylphenyl diphenyl phosphate         | 3IPPDPP   | 69515-46-4 | 13C TPhP | 101 ± 6.6 |
| 4-Isopropylphenyl diphenyl phosphate         | 4IPPDPP   | 55864-04-5 | 13C TPhP | 101 ± 6.6 |
| Bis(2-isopropylphenyl) phenyl phosphate      | B2IPPPP   | 69500-29-4 | 13C TPhP | 101 ± 6.6 |
| Bis (3-isopropylphenyl) phenyl phosphate     | B3IPPPP   | 69500-30-7 | 13C TPhP | 101 ± 6.6 |
| Bis (4-isopropylphenyl) phenyl phosphate     | B4IPPPP   | 55864-07-8 | 13C TPhP | 101 ± 6.6 |
| 2,4-Diisopropylphenyl diphenyl phosphate     | 24DIPPDPP | n.a.       | 13C TPhP | 101 ± 6.6 |
| Tris(3-isopropylphenyl) phosphate            | T3IPPP    | 72668-27-0 | 13C TPhP | 101 ± 6.6 |
| Tris(4-isopropylphenyl) phosphate            | T4IPPP    | 26967-76-0 | 13C TPhP | 101 ± 6.6 |
| Bis (2,4-diisopropylphenyl) phenyl phosphate | B24DIPPPP | n.a.       | 13C TPhP | 101 ± 6.6 |
| 2-tert-butylphenyl diphenyl phosphate        | 2tBPDPP   | 83242-23-3 | 13C TPhP | 101 ± 6.6 |

|                                          |                                |            |                    |           |
|------------------------------------------|--------------------------------|------------|--------------------|-----------|
| 4-tert-butylphenyl diphenyl phosphate    | 4tBPDPP                        | 981-40-8   | 13C TPhP           | 101 ± 6.6 |
| bis(2-tert-butylphenyl) phenyl phosphate | B2tBPPP                        | 65652-41-7 | 13C TPhP           | 101 ± 6.6 |
| bis(4-tert-butylphenyl) phenyl phosphate | B4tBPPP                        | 115-87-7   | 13C TPhP           | 101 ± 6.6 |
| Tris(4-tert-butylphenyl) phosphate       | T4tBPP                         | 78-33-1    | 13C TPhP           | 101 ± 6.6 |
| Dibenzofuran                             | Dibenzofuran                   | 132-64-9   | D10-acenaphthene   | 69 ± 5.5  |
| 3-Methylcholanthrene                     | 3-Methylcholanthrene           | 56-49-5    | D12-Benzo[a]pyrene | 101 ± 16  |
| 7,12-Dimethylbenz(a)anthracene           | 7,12-Dimethylbenz(a)anthracene | 57-97-6    | D12-Benzo[a]pyrene | 101 ± 16  |
| Acenaphthylene                           | Acenaphthylene                 | 208-96-8   | D10-acenaphthene   | 69 ± 5.5  |
| Acenaphthene                             | Acenaphthene                   | 83-32-9    | D10-acenaphthene   | 69 ± 5.5  |
| Anthracene                               | Anthracene                     | 120-12-7   | D10-pyrene         | 88 ± 2.8  |
| 1,2 Benzanthracene (Benz[a]anthracene)   | Benz[a]anthracene              | 56-55-3    | D12-Benzo[a]pyrene | 101 ± 16  |
| Benzo(c)phenanthrene                     | Benzo(c)phenanthrene           | 195-19-7   | F-BDE-69           | 85 ± 7.5  |
| Benzo(g,h,i)perylene                     | Benzo(g,h,i)perylene           | 191-24-2   | D12-Benzo[a]pyrene | 101 ± 16  |
| Benzo(j)fluoranthene                     | Benzo(j)fluoranthene           | 205-82-3   | D12-Benzo[a]pyrene | 101 ± 16  |
| Benzo[a]pyrene                           | Benzo[a]pyrene                 | 50-32-8    | D12-Benzo[a]pyrene | 101 ± 16  |
| Benzo[b]fluoranthene                     | Benzo[b]fluoranthene           | 205-99-2   | D12-Benzo[a]pyrene | 101 ± 16  |
| Benzo[e]pyrene                           | Benzo[e]pyrene                 | 192-97-2   | D12-Benzo[a]pyrene | 101 ± 16  |

|                               |                        |            |                        |          |
|-------------------------------|------------------------|------------|------------------------|----------|
| Benzo[k]fluoranthene          | Benzo[k]fluoranthene   | 207-08-9   | D12-Benzo[a]pyrene     | 101 ± 16 |
| Chrysene                      | Chrysene               | 218-01-9   | F-BDE-69               | 85 ± 7.5 |
| Dibenz(a,h)anthracene         | Dibenz(a,h)anthracene  | 53-70-3    | D12-Benzo[a]pyrene     | 101 ± 16 |
| Dibenz[a,h]pyrene             | Dibenz[a,h]pyrene      | 189-64-0   | D14-Dibenzo(a,i)pyrene | 68 ± 10  |
| Dibenz[a,i]pyrene             | Dibenz[a,i]pyrene      | 189-55-9   | D14-Dibenzo(a,i)pyrene | 68 ± 10  |
| Dibenz[a,l]pyrene             | Dibenz[a,l]pyrene      | 191-30-0   | D14-Dibenzo(a,i)pyrene | 68 ± 10  |
| Fluoranthene                  | Fluoranthene           | 206-44-0   | D10-pyrene             | 88 ± 2.8 |
| Fluorene                      | Fluorene               | 86-73-7    | D10-phenanthrene       | 81 ± 15  |
| Indeno(1,2,3-cd)pyrene        | Indeno(1,2,3-cd)pyrene | 193-39-5   | D12-Benzo[a]pyrene     | 101 ± 16 |
| Naphthalene                   | Naphthalene            | 91-20-3    | D8-Napthalene          | 78 ± 5   |
| Perylene                      | Perylene               | 198-55-0   | D12-Benzo[a]pyrene     | 101 ± 16 |
| Phenanthrene                  | Phenanthrene           | 85-01-8    | D10-phenanthrene       | 81 ± 15  |
| Pyrene                        | Pyrene                 | 129-00-0   | D10-pyrene             | 88 ± 2.8 |
| 3,3'-Dichlorobiphenyl         | PCB 11                 | 2050-67-1  | 13C-PCB-52             | 76 ± 7.0 |
| 2,4,4'-Trichlorobiphenyl      | PCB28                  | 7012-37-5  | 13C-PCB-52             | 76 ± 7.0 |
| 2,2',4,4'-Tetrachlorobiphenyl | PCB47                  | 2437-79-8  | 13C-PCB-52             | 76 ± 7.0 |
| 2,2',4,6'-Tetrachlorobiphenyl | PCB51                  | 68491-04-7 | 13C-PCB-52             | 76 ± 7.0 |
| 2,2',5,5'-Tetrachlorobiphenyl | PCB52                  | 35693-99-3 | 13C-PCB-52             | 76 ± 7.0 |
| 2,3',4,5'-Tetrachlorobiphenyl | PCB68                  | 73575-52-7 | 13C-PCB-52             | 76 ± 7.0 |

|                                      |                 |             |                    |           |
|--------------------------------------|-----------------|-------------|--------------------|-----------|
| 2,2',4,5,5'-Pentachlorobiphenyl      | PCB101          | 37680-73-2  | 13C-PCB-52         | 76 ± 7.0  |
| 2,3',4,4',5-Pentachlorobiphenyl      | PCB118          | 31508-00-6  | 13C-PCB-52         | 76 ± 7.0  |
| 2,2',3,4,4',5'-Hexachlorobiphenyl    | PCB138          | 35065-28-2  | 13C-PCB-153        | 80 ± 6.7  |
| 2,2',4,4',5,5'-Hexachlorobiphenyl    | PCB153          | 35065-27-1  | 13C-PCB-153        | 80 ± 6.7  |
| 2,2',3,4,4',5,5'-Heptachlorobiphenyl | PCB180          | 35065-29-3  | 13C-PCB-153        | 80 ± 6.7  |
| 2,2',3,4,4',5',6-Heptachlorobiphenyl | PCB183          | 52663-69-1  | 13C-PCB-153        | 80 ± 6.7  |
| Atrazine                             | Atrazine        | 1912-24-9   | D10-chlorpyrifos   | 100 ± 7.6 |
| Azoxystrobin                         | Azoxystrobin    | 131860-33-8 | 13C-cis-permethrin | 95 ± 12   |
| chlorfenapyr                         | chlorfenapyr    | 122453-73-0 | d-BBP              | 104 ± 5   |
| Chlorpyrifos                         | Chlorpyrifos    | 2921-88-2   | D10-chlorpyrifos   | 100 ± 7.6 |
| cis-Chlordane                        | cis-Chlordane   | 5103-71-9   | 13C-PCB-153        | 80 ± 6.7  |
| cis-Permethrin                       | cis-Permethrin  | 61949-76-6  | 13C-cis-permethrin | 95 ± 12   |
| cypermethrin*                        | cypermethrin    | 52315-07-8  | 13C-cis-permethrin | 95 ± 12   |
| Fipronil                             | Fipronil        | 120068-37-3 | d-BBP              | 104 ± 5   |
| Fluoxastrobin                        | Fluoxastrobin   | 193740-76-0 | 13C-cis-permethrin | 95 ± 12   |
| DEET                                 | DEET            | 134-62-3    | d-DEET             | 93 ± 9.3  |
| Lindane                              | Lindane         | 58-89-9     | D10-phenanthrene   | 81 ± 15   |
| Malathion                            | Malathion       | 121-75-5    | dTDCPP             | 82 ± 9.0  |
| p,p'-DDE                             | p,p'-DDE        | 72-55-9     | 13C-PCB-153        | 80 ± 6.7  |
| pyraclostrobin                       | pyraclostrobin  | 175013-18-0 | 13C-cis-permethrin | 95 ± 12   |
| trans-Chlordane                      | trans-Chlordane | 5103-74-2   | 13C-PCB-153        | 80 ± 6.7  |

|                                  |                  |             |                    |          |
|----------------------------------|------------------|-------------|--------------------|----------|
| trans-Permethrin                 | trans-Permethrin | 61949-77-7  | 13C-cis-permethrin | 95 ± 12  |
| Trifloxystrobin                  | Trifloxystrobin  | 141517-21-7 | 13C-cis-permethrin | 95 ± 12  |
| propiconazole                    | Pzole            | 60207-90-1  | d-BBP              | 104 ± 5  |
| Cyprodinil                       | Cyprodinil       | 121552-61-2 | d-DEET             | 93 ± 9.3 |
| Oxyfluorfen                      | Oxyfluorfen      | 42874-03-3  | d-DEET             | 93 ± 9.3 |
| benzyl butyl phthalate           | BBP              | 85-68-7     | d-BBP              | 104 ± 5  |
| dibutyl phthalate                | DBP              | 84-74-2     | d-DEET             | 93 ± 9.3 |
| Bis (2-ethylhexyl) adipate       | DEHA             | 103-23-1    | d-BBP              | 104 ± 5  |
| Bis(2-ethylhexyl) phthalate      | DEHP             | 117-81-7    | d-DEHP             | 95 ± 4.2 |
| Bis (2-ethylhexyl) terephthalate | DEHT             | 6422-86-2   | d-DEHP             | 95 ± 4.2 |
| di-ethyl phthalate               | DEP              | 84-66-2     | d-DEP              | 91 ± 9.1 |
| di-isobutyl phthalate            | DiBP             | 84-69-5     | d-DEET             | 93 ± 9.3 |
| di-isononyl phthalate            | DINP             | 68515-48-0  | d-DEHP             | 95 ± 4.2 |
| di-methyl phthalate              | DMP              | 131-11-3    | d-DMP              | 79 ± 4.9 |
| trioctylmetallitate              | TOTM             | 3319-31-1   | d-DEHP             | 95 ± 4.2 |
| nonylphenol isomer mix           | NP               | 25154-52-3  | d-TnBP             | 90 ± 3.9 |
| 4-tert-octylphenol               | OP               | 27193-28-8  | d-TnBP             | 90 ± 3.9 |
| lilial                           | lilial           | 80-54-6     | d-DEP              | 91 ± 9.1 |

96

97

98

99

100

101

102 **Table S3.** Full list of BFR target analytes in the GC-NCI-HRMS panel, along with the internal standards and their recovery during  
 103 extraction.

| <b>Analytes</b>                                 | <b>Abbreviation</b> | <b>CAS #</b> | <b>Internal Standard</b>         | <b>Internal Standard Recovery</b> |
|-------------------------------------------------|---------------------|--------------|----------------------------------|-----------------------------------|
| 2,4,4'-tribromodiphenyl ether                   | BDE 28              | 41318-75-6   | F-BDE-69                         | 100 ± 7                           |
| 2,2',4,4'-tetrabromodiphenyl ether              | BDE 47              | 5436-43-1    | F-BDE-69                         | 100 ± 7                           |
| 2,3',4,4'-tetrabromodiphenyl ether              | BDE 66              | 189084-61-5  | F-BDE-69                         | 100 ± 7                           |
| 2,2',3,4,4'-pentabromodiphenyl ether            | BDE 85              | 182346-21-0  | F-BDE-69                         | 100 ± 7                           |
| 2,2',4,4',5-pentabromodiphenyl ether            | BDE 99              | 60348-60-9   | F-BDE-69                         | 100 ± 7                           |
| 2,2',4,4',6-pentabromodiphenyl ether            | BDE 100             | 189084-64-8  | F-BDE-69                         | 100 ± 7                           |
| 2,2',4,4',5,5'-hexabromodiphenyl ether          | BDE 153             | 68631-49-2   | F-BDE-69                         | 100 ± 7                           |
| 2,2',4,4',5,6'-hexabromodiphenyl ether          | BDE 154             | 207122-15-4  | F-BDE-69                         | 100 ± 7                           |
| 2,2',3,4,4',5',6-heptabromodiphenyl ether       | BDE 183             | 207122-16-5  | F-BDE-69                         | 100 ± 7                           |
| Decabromodiphenyl ether                         | BDE 209             | 1163-19-5    | <sup>13</sup> C (M + 12) BDE-209 | 83 ± 6                            |
| Decabromodiphenyl ethane                        | DBDPE               | 84852-53-9   | <sup>13</sup> C (M + 12) BDE-209 | 83 ± 6                            |
| 2-ethyl hexyl-2,3,4,5-tetrabromobenzoate        | EHTBB               | 183658-27-7  | <sup>13</sup> C (M + 6) EHTBB    | 141 ± 17                          |
| Bis (2-ethyl hexyl)-2,3,4,5-tetrabromophthalate | BEHTBP              | 26040-51-7   | <sup>13</sup> C (M + 6) BEHTBP   | 103 ± 17                          |
| Bistribromophenoxyethane                        | BTBPE               | 37853-59-1   | <sup>13</sup> C (M + 6) BEHTBP   | 103 ± 17                          |

|                                                    |            |             |                                  |          |
|----------------------------------------------------|------------|-------------|----------------------------------|----------|
| Octabromotrimethylphenylindane                     | OBIND      | 155613-93-7 | <sup>13</sup> C (M + 6) BEHTBP   | 103 ± 17 |
| Tetrabromobisphenol A                              | TBBPA      | 79-94-7     | <sup>13</sup> C (M + 6) BEHTBP   | 103 ± 17 |
| 2,4,6-tris(2,4,6-tribromophenoxy)-1,3,5-triazine   | TTBP-TAZ   | 25713-60-4  | <sup>13</sup> C (M + 12) BDE-209 | 83 ± 6   |
| Tetrabromobisphenol A bis(2,3-dibromopropyl ether) | TBBPA-DBPE | 21850-44-2  | <sup>13</sup> C (M + 12) BDE-209 | 83 ± 6   |
| Tris (2,3-dibromopropyl) isocyanurate              | TDBPIC     | 52434-90-9  | <sup>13</sup> C (M + 12) BDE-209 | 83 ± 6   |

104

105

106

107

108

109

110

111

112

113

114

115

116 **Table S4:** Descriptive statistics and air concentrations (ng/m<sup>3</sup>) for the additional SVOCs (non-PFAS) measured in fire station indoor  
 117 air samples (n=25). \*- indicates the sum of three structural isomers.

| <b>Chemical</b> | <b>Detection Limit (ng/m<sup>3</sup>)</b> | <b>Detection Frequency (%)</b> | <b>25<sup>th</sup> Percentile</b> | <b>50<sup>th</sup> Percentile</b> | <b>75<sup>th</sup> Percentile</b> | <b>Maximum</b> |
|-----------------|-------------------------------------------|--------------------------------|-----------------------------------|-----------------------------------|-----------------------------------|----------------|
| 2IPDPDP         | 0.730                                     | 4                              | NA                                | NA                                | NA                                | 0.75           |
| 3IPDPDP         | 0.030                                     | 0                              | NA                                | NA                                | NA                                | NA             |
| 2tBPDPP         | 0.003                                     | 0                              | NA                                | NA                                | NA                                | NA             |
| B2IPPPP         | 0.013                                     | 8                              | NA                                | NA                                | NA                                | 0.35           |
| 4IPDPDP         | 0.262                                     | 4                              | NA                                | NA                                | NA                                | 0.53           |
| 24DIPDPDP       | 0.270                                     | 8                              | NA                                | NA                                | NA                                | 2.06           |
| 4tBPDPP         | 0.596                                     | 4                              | NA                                | NA                                | NA                                | 2.47           |
| B3IPPPP         | 0.043                                     | 4                              | NA                                | NA                                | NA                                | 0.08           |
| B2tBPPP         | 0.033                                     | 0                              | NA                                | NA                                | NA                                | NA             |
| B4IPPPP         | 0.058                                     | 0                              | NA                                | NA                                | NA                                | NA             |
| T3IPPP          | 0.223                                     | 0                              | NA                                | NA                                | NA                                | NA             |
| B24DIPPPP       | 0.683                                     | 0                              | NA                                | NA                                | NA                                | NA             |
| B4tBPPP         | 0.386                                     | 4                              | NA                                | NA                                | NA                                | 1.03           |
| T4IPPP          | 0.037                                     | 0                              | NA                                | NA                                | NA                                | NA             |
| T4tBPP          | 0.006                                     | 4                              | NA                                | NA                                | NA                                | 0.07           |
| TEP             | 1.025                                     | 92                             | 2.00                              | 4.07                              | 18.47                             | 463.34         |
| TiPP            | 0.494                                     | 0                              | NA                                | NA                                | NA                                | NA             |
| TPrP            | 0.009                                     | 4                              | NA                                | NA                                | NA                                | 0.04           |
| TiBP            | 0.026                                     | 100                            | 0.09                              | 0.17                              | 0.30                              | 0.68           |
| TnBP            | 0.680                                     | 68                             | NA                                | 0.83                              | 1.50                              | 8.21           |
| TCEP            | 0.14                                      | 64                             | NA                                | 0.16                              | 0.24                              | 0.85           |
| Sum TCPP*       | 1.350                                     | 92                             | 6.92                              | 8.41                              | 14.73                             | 31.49          |
| TPeP            | 0.016                                     | 4                              | NA                                | NA                                | NA                                | 0.020          |
| TDCPP           | 0.585                                     | 28                             | NA                                | NA                                | 0.610                             | 1.54           |
| TBOEP           | 2.301                                     | 12                             | NA                                | NA                                | NA                                | 5.37           |
| TPHP            | 1.367                                     | 20                             | NA                                | NA                                | NA                                | 5.11           |

|                                |       |     |       |        |        |        |
|--------------------------------|-------|-----|-------|--------|--------|--------|
| EHDPP                          | 0.120 | 88  | 0.13  | 0.22   | 0.32   | 2.78   |
| TEHP                           | 0.008 | 56  | NA    | 0.06   | 0.10   | 0.26   |
| isodecylPP                     | 0.314 | 4   | NA    | NA     | NA     | 0.67   |
| ToCP                           | 0.391 | 0   | NA    | NA     | NA     | NA     |
| TmCP                           | 0.023 | 0   | NA    | NA     | NA     | NA     |
| TpCP                           | 0.602 | 0   | NA    | NA     | NA     | NA     |
| TDMPP                          | 0.081 | 0   | NA    | NA     | NA     | NA     |
| Dibenzofuran                   | 0.998 | 100 | 7.12  | 7.98   | 18.0   | 26.24  |
| Nicotine                       | 0.389 | 0   | NA    | NA     | NA     | NA     |
| Lilial                         | 0.376 | 100 | 2.46  | 6.06   | 13.75  | 103.13 |
| Naphthalene                    | 7.731 | 100 | 88.27 | 131.53 | 177.32 | 627.01 |
| Acenaphthylene                 | 0.204 | 100 | 2.17  | 3.26   | 9.51   | 23.46  |
| Acenaphthene                   | 0.472 | 100 | 4.06  | 7.29   | 13.81  | 59.26  |
| Fluorene                       | 0.677 | 100 | 6.72  | 9.42   | 14.99  | 52.53  |
| Phenanthrene                   | 2.530 | 100 | 11.86 | 14.69  | 29.04  | 93.86  |
| Anthracene                     | 0.309 | 100 | 0.85  | 1.44   | 2.63   | 10.69  |
| Fluoranthene                   | 0.764 | 100 | 0.93  | 1.54   | 2.22   | 3.62   |
| Pyrene                         | 0.015 | 84  | 0.99  | 1.26   | 2.05   | 3.46   |
| Benzo(c)phenanthrene           | 0.008 | 28  | NA    | NA     | 0.02   | 0.051  |
| Benz[a]anthracene              | 0.011 | 24  | NA    | NA     | NA     | 0.048  |
| Chrysene                       | 0.016 | 48  | NA    | NA     | 0.03   | 0.17   |
| 7,12-Dimethylbenz(a)anthracene | 0.030 | 0   | NA    | NA     | NA     | NA     |
| Benzo[j,b,k]fluoranthene       | 0.100 | 0   | NA    | NA     | NA     | NA     |
| Benzo[e]pyrene                 | 0.099 | 0   | NA    | NA     | NA     | NA     |
| Benzo[a]pyrene                 | 0.026 | 12  | NA    | NA     | NA     | 0.035  |
| Perylene                       | 0.030 | 0   | NA    | NA     | NA     | NA     |
| 3-Methylcholanthrene           | 0.015 | 0   | NA    | NA     | NA     | NA     |
| Indeno(1,2,3-cd)pyrene         | 0.011 | 0   | NA    | NA     | NA     | NA     |
| Dibenz(a,h)anthracene          | 0.011 | 0   | NA    | NA     | NA     | NA     |
| Benzo(g,h,i)perylene           | 0.216 | 0   | NA    | NA     | NA     | NA     |
| Dibenz[a,l]pyrene              | 0.060 | 0   | NA    | NA     | NA     | NA     |
| Dibenz[a,i]pyrene              | 0.558 | 0   | NA    | NA     | NA     | NA     |
| Dibenz[a,h]pyrene              | 0.193 | 0   | NA    | NA     | NA     | NA     |

|                  |       |     |       |       |       |       |
|------------------|-------|-----|-------|-------|-------|-------|
| PCB11            | 0.009 | 100 | 0.15  | 0.26  | 0.32  | 0.49  |
| PCB28            | 0.002 | 60  | NA    | 0.004 | 0.01  | 0.06  |
| PCB51            | 0.008 | 0   | NA    | NA    | NA    | NA    |
| PCB52            | 0.007 | 0   | NA    | NA    | NA    | NA    |
| PCB47            | 0.007 | 0   | NA    | NA    | NA    | NA    |
| PCB68            | 0.006 | 0   | NA    | NA    | NA    | NA    |
| PCB101           | 0.000 | 0   | NA    | NA    | NA    | NA    |
| PCB118           | 0.015 | 0   | NA    | NA    | NA    | NA    |
| PCB153           | 0.012 | 0   | NA    | NA    | NA    | NA    |
| PCB138           | 0.008 | 0   | NA    | NA    | NA    | NA    |
| PCB183           | 0.004 | 0   | NA    | NA    | NA    | NA    |
| PCB180           | 0.056 | 0   | NA    | NA    | NA    | NA    |
| DEET             | 0.472 | 100 | 9.80  | 37.1  | 52.69 | 195.8 |
| Atrazine         | 0.049 | 0   | NA    | NA    | NA    | NA    |
| Lindane          | 0.009 | 0   | NA    | NA    | NA    | NA    |
| Malathion        | 0.052 | 0   | NA    | NA    | NA    | NA    |
| Chlorpyrifos     | 0.016 | 8   | NA    | NA    | NA    | 0.028 |
| Cyprodinil       | 0.001 | 16  | NA    | NA    | NA    | 0.103 |
| Fipronil         | 0.120 | 0   | NA    | NA    | NA    | NA    |
| trans-Chlordane  | 0.026 | 88  | 0.032 | 0.06  | 0.13  | 50.3  |
| cis-Chlordane    | 0.026 | 25  | NA    | NA    | 0.028 | 17.4  |
| Oxyfluorfen      | 0.15  | 0   | NA    | NA    | NA    | NA    |
| p,p'-DDE         | 0.00  | 0   | NA    | NA    | NA    | NA    |
| chlorfenapyr     | 0.12  | 40  | NA    | NA    | NA    | 6.89  |
| Trifloxystrobin  | 0.01  | 0   | NA    | NA    | NA    | NA    |
| Propiconazole    | 0.01  | 8   | NA    | NA    | NA    | 1.441 |
| cis-Permethrin   | 0.10  | 12  | NA    | NA    | NA    | 0.221 |
| trans-Permethrin | 0.17  | 4   | NA    | NA    | NA    | 0.197 |
| cypermethrin     | 0.56  | 0   | NA    | NA    | NA    | NA    |
| Pyraclostrobin   | 0.01  | 0   | NA    | NA    | NA    | NA    |
| Azoxystrobin     | 0.64  | 0   | NA    | NA    | NA    | NA    |
| Fluoxastrobin    | 0.67  | 0   | NA    | NA    | NA    | NA    |
| 4tOP             | 0.34  | 100 | 5.58  | 9.51  | 13.97 | 45.03 |

|          |       |     |       |       |        |        |
|----------|-------|-----|-------|-------|--------|--------|
| NP       | 7.94  | 100 | 24.66 | 39.86 | 61.07  | 188.91 |
| DMP      | 3.01  | 88  | 4.95  | 11.27 | 31.79  | 48.84  |
| DEP      | 8.86  | 92  | 31.47 | 43.08 | 78.81  | 196.45 |
| DBP      | 7.32  | 100 | 32.76 | 72.39 | 109.9  | 470.23 |
| DiBP     | 24.41 | 84  | 28.68 | 46.50 | 73.22  | 275.79 |
| BBP      | 4.31  | 24  | NA    | NA    | NA     | 82.82  |
| DEHA     | 20.91 | 16  | NA    | NA    | NA     | 64.23  |
| DEHP     | 16.27 | 0   | NA    | NA    | NA     | NA     |
| DEHT     | 43.53 | 4   | NA    | NA    | NA     | 48.35  |
| DINP     | 83.60 | 4   | NA    | NA    | NA     | 146.05 |
| TOTM     | 0.83  | 0   | NA    | NA    | NA     | NA     |
| BDE 28   | 0.013 | 24  | NA    | NA    | NA     | 0.030  |
| BDE 47   | 0.103 | 16  | NA    | NA    | NA     | 0.515  |
| BDE 66   | 0.002 | 36  | NA    | NA    | 0.0035 | 0.009  |
| BDE 100  | 0.003 | 16  | NA    | NA    | NA     | 0.024  |
| BDE 99   | 0.023 | 16  | NA    | NA    | NA     | 0.081  |
| BDE 85   | 0.004 | 0   | NA    | NA    | NA     | NA     |
| BDE 154  | 0.002 | 0   | NA    | NA    | NA     | NA     |
| BDE 153  | 0.005 | 0   | NA    | NA    | NA     | NA     |
| BDE 183  | 0.005 | 0   | NA    | NA    | NA     | NA     |
| BDE 209  | 0.586 | 0   | NA    | NA    | NA     | NA     |
| EHTBB    | 0.102 | 48  | NA    | NA    | 0.388  | 1.92   |
| BEHTBP   | 0.183 | 32  | NA    | NA    | 0.266  | 0.75   |
| BTBPE    | 1.059 | 0   | NA    | NA    | NA     | NA     |
| OBIND    | 0.049 | 0   | NA    | NA    | NA     | NA     |
| DBDPE    | 0.722 | 0   | NA    | NA    | NA     | NA     |
| TDBPIC   | 6.049 | 0   | NA    | NA    | NA     | NA     |
| TTBP-TAZ | 0.150 | 0   | NA    | NA    | NA     | NA     |

119 **Table S5:** Median air levels (ng/m<sup>3</sup>) for frequently detected chemicals based on room. Mean  
 120 values are presented for a few chemicals in which the distribution of data was found to be normal  
 121 (Dibenzofuran, Fluoranthene, Pyrene, PCB11, NP, DMP). \*Indicates chemicals that were  
 122 significantly different in Closed Gear Room vs Open Gear Rooms. # Indicates chemicals that  
 123 were significantly different in Closed Gear Rooms vs Day Rooms. Comparisons with Supply  
 124 were not made since it is one location sampled in three different areas of the building.

| <b>Chemical</b> | <b>Closed<br/>(n=7)</b> | <b>Open<br/>(n=5)</b> | <b>Day<br/>(n=10)</b> | <b>Supply<br/>(n=3)</b> |
|-----------------|-------------------------|-----------------------|-----------------------|-------------------------|
| 6:2FTOH*        | 67.89                   | 6.15                  | 9.30                  | 95.25                   |
| 8:2FTOH*        | 21.69                   | 2.04                  | 6.49                  | 53.3                    |
| 10:2FTOH*       | 25.82                   | 1.64                  | 9.39                  | 55.3                    |
| 8:2FTAC*        | 0.064                   | 0.005                 | 0.012                 | 0.192                   |
| 6:2FTMAC*       | 0.2                     | 0.05                  | 0.16                  | 0.15                    |
| MeFBSE#         | 48.44                   | 7.61                  | 2.37                  | 52.8                    |
| PCBTF           | 4.26                    | 0.704                 | 4.83                  | 1.06                    |
| TEP#            | 24.3                    | 2.32                  | 3.09                  | 1.9                     |
| TiBP*           | 0.38                    | 0.046                 | 0.19                  | 0.12                    |
| TnBP            | 1.20                    | 0.829                 | 0.794                 | 0.34                    |
| TCEP            | 0.18                    | 0.07                  | 0.163                 | 0.207                   |
| Sum TCPP        | 8.18                    | 6.3                   | 11.17                 | 0.07                    |
| EHDPP           | 0.783                   | 0.242                 | 0.14                  | 0.22                    |
| TEHP            | 0.121                   | 0.066                 | 0.04                  | 0.05                    |
| Dibenzofuran*   | 18.3                    | 6.87                  | 10.73                 | 9.09                    |
| Lilial          | 6.06                    | 2.19                  | 15.23                 | 2.68                    |
| Naphthalene     | 166                     | 156                   | 106                   | 74.1                    |
| Acenaphthylene  | 9.72                    | 2.9                   | 2.32                  | 5.33                    |
| Acenaphthene*   | 10.78                   | 4.06                  | 10.48                 | 4.26                    |
| Fluorene        | 13.0                    | 7.33                  | 8.85                  | 6.72                    |
| Phenanthrene*   | 28.1                    | 13.4                  | 14.1                  | 14.2                    |
| Anthracene*     | 2.93                    | 0.96                  | 1.39                  | 0.90                    |
| Fluoranthene#   | 2.49                    | 2.14                  | 1.08                  | 1.06                    |
| Pyrene          | 1.99                    | 1.49                  | 0.92                  | 1.10                    |
| PCB11           | 0.285                   | 0.167                 | 0.31                  | 0.09                    |
| PCB28           | 0.001                   | 0.001                 | 0.01                  | 0.01                    |
| DEET            | 52.7                    | 11.7                  | 42.5                  | 3.78                    |
| trans-Chlordane | 0.301                   | 0.059                 | 0.06                  | 0.01                    |
| 4tOP            | 10.5                    | 15.3                  | 7.36                  | 5.58                    |
| NP              | 52.82                   | 21.2                  | 68.5                  | 117                     |
| DMP*#           | 31.02                   | 7.516                 | 16.30                 | 1.51                    |
| DEP*            | 110                     | 32.82                 | 42.5                  | 25.0                    |
| DBP             | 106                     | 72.39                 | 62.55                 | 8.86                    |
| DiBP            | 76.0                    | 49.8                  | 40.1                  | 23.1                    |

125  
 126

**Table S6:** Spearman correlation coefficients comparing levels in paired gear storage rooms vs day rooms sampled simultaneously (n=10). Both open and closed turnout storage rooms were included. \* Indicates statistically significant.

| <b>Chemical</b> | <b>Correlation Coefficient</b> | <b>p-value</b> |
|-----------------|--------------------------------|----------------|
| 6:2FTOH         | 0.36                           | 0.29           |
| 8:2FTOH         | 0.60                           | 0.60           |
| 10:2FTOH        | 0.04                           | 0.89           |
| 8:2FTAC*        | 0.68                           | 0.03           |
| 6:2FTMAC        | 0.40                           | 0.23           |
| MeFBSE*         | 0.66                           | 0.03           |
| PCBTF           | 0.36                           | 0.29           |
| TEP             | 0.59                           | 0.07           |
| TiBP            | 0.29                           | 0.40           |
| TnBP            | -0.05                          | 0.87           |
| TCEP            | -0.04                          | 0.89           |
| Sum TCPP*       | 0.78                           | 0.01           |
| EHDPP           | 0.27                           | 0.45           |
| TEHP            | -0.39                          | 0.26           |
| Dibenzofuran    | 0.115                          | 0.73           |
| Lilial          | 0.32                           | 0.35           |
| Naphthalene     | -0.67                          | 0.84           |
| Acenaphthylene  | 0.10                           | 0.76           |
| Acenaphthene    | 0.53                           | 0.11           |
| Fluorene        | 0.50                           | 0.13           |
| Phenanthrene    | 0.31                           | 0.37           |
| Anthracene      | 0.37                           | 0.28           |
| Fluoranthene    | 0.38                           | 0.26           |
| Pyrene          | 0.37                           | 0.28           |
| PCB11           | 0.21                           | 0.54           |
| PCB28           | 0.17                           | 0.61           |
| DEET            | 0.36                           | 0.29           |
| trans-Chlordane | 0.47                           | 0.16           |
| 4tOP            | -0.09                          | 0.79           |
| NP              | 0.47                           | 0.16           |
| DMP             | 0.52                           | 0.12           |
| DEP             | 0.33                           | 0.33           |
| DBP*            | 0.70                           | 0.02           |
| DiBP            | 0.49                           | 0.14           |

**Table S7.** Parameters Used in Estimating PFOA Exposure Risk.

| <b>Parameter</b> | <b>Description</b>                         | <b>Value</b>           | <b>Reference</b>                                             |
|------------------|--------------------------------------------|------------------------|--------------------------------------------------------------|
| $C_A$            | Concentration of 8:2 FTOH in room          | variable               | This Study; Table S8                                         |
| InhR             | Inhalation Rate                            | 0.6 m <sup>3</sup> /hr | EPA Exposure Handbook, 2011; Table 6-1                       |
| $M_R$            | 8:2 FTOH Conversion to PFOA (mole to mole) | 5%                     | Fromme et al., 2009 [19]; Himmelstein et al. 2012 [32]       |
| ADD              | Acceptable Daily Dose                      | 4 ng/day               | Derived from MCL and IR <sub>w</sub>                         |
| MCL              | Maximum Contaminant Level                  | 4 ng/L                 | US EPA Final PFAS National Primary Drinking Water Regulation |
| IR <sub>w</sub>  | Drinking Water Ingestion Rate              | 1.04 L/day             | US EPA Exposure Factors Handbook, 2011; Table 3-1            |

**Table S8.** Individual rooms assessed for inhalation exposure to PFOA as calculated using equation 1 and the estimated time to reach an exposure equivalent to the ADD for PFOA.
